# Supplementary material
Source: PubMed Central journal article supplement (PMC2919138)

**Suppl. Fig. S1. Cloning scheme for the generation of bacterial polycistronic TAK1 complex expression vectors.** *A*, cDNAs encoding for TAK1, TAB1 or TAB2 were individually subcloned into pOLY3.TEV and pOLY1 bacterial expression vectors, respectively. All vectors carry an ampicillin resistance gene (ampR). *B*, Following enzymatic restriction reaction, single cistrons from pTAB1 and pTAB2 were successively ligated into pHis-TAK1 using the compatible SpeI and XbaI as well as the BlnI restriction sites, which results in the tricistronic pHis-TAK1-TAB1-TAB2 construct. *C*, The resulting polycistronic gene consists of a promoter, ribosome-binding sites (RBS), the open reading frames of the according TAK1 complex proteins and a transcriptional terminator. Modified after Neumann et al., (2003) *Protein Expr Purif* **30**(2), 230-237.

**Suppl. Fig. S2. Bacterial expression and Nickel affinity purification of TAK1 and TAK1 containing complexes.** *A*, Western blot analysis of different purification steps of bacterially expressed His-TAK1 using anti-Penta-His and anti-TAK1 antibodies. *B*, *C*, and *D*, as in *A* but describing the purification of bacterially expressed His-TAK1-TAB1, His-TAK1-TAB2 and His-TAK1-TAB1-TAB2, respectively. Additionally, anti-TAB1 and anti-TAB2 antibodies were used for Western blot analysis. Whole bacterial cell lysate (lysate, 2.5 µg/lane), pellet of insoluble protein after centrifugation of cell lysate (P, 2.5 µg/lane), corresponding supernatant containing all soluble proteins (SN, 2.5 µg/lane), flow through fraction (FT, 2.5 µg/lane), first washing step (W1, 2.5 µg/lane), second washing step (W2, 7.5 µl/lane) and elution (Elu, 2.5 µg/lane).

**Suppl. Fig. S3. Overexpression of HA-TAK1 and FLAG-TAK1 in AMPK $\alpha$  subunit double knockout ( $\alpha 1^{-/-}$ ,  $\alpha 2^{-/-}$ ) MEFs.** AMPK $\alpha$  subunit double knockout ( $\alpha 1^{-/-}$ ,  $\alpha 2^{-/-}$ ) MEFs were transfected with plasmids encoding HA-TAK1 and FLAG-TAK1 and expression of respective proteins was confirmed by Western blot analysis of the total cell lysates.

**Suppl. Fig. S4. Recovery of intermolecular TAK1  $\alpha$ G-helix mutant phosphorylation by potential TAK1 rescue mutants.** *A*, Western blot analysis of bacterially expressed TAK1 (T178E, T184E)  $\alpha$ G-helix mutants TAK1(A236K, M240K)-TAB1 (AM), TAK1(F237K, W241K)-TAB1 (FW), TAK1(W241K, V243K)-TAB1 (WV), and TAK1(I239K, V243K)-TAB1 (IV). Note, all  $\alpha$ G-helix mutants additionally carried mutations replacing Thr178 and Thr184 by glutamate thus potentially mimicking phosphorylation of the corresponding activation segment sites. WT-TAK1-TAB1 and KW-TAK1-TAB1 served as a control. Western blotting utilized anti-TAK1, anti-TAB1 and phospho-specific anti-TAK1 Thr184/Thr187 ( $\alpha$ -P184/187) antibodies. *B*, upper left panel, TAK1(A236E, M240E)-TAB1 (AEME) was incubated with TAK1(T178E, T184E, A236K, M240K)-TAB1 for 20 min at 30 °C to analyze the potential of restoring activation segment phosphorylation by electrostatic attraction of corresponding  $\alpha$ G-helix residues. 150 µg/ml of each TAK1 complex was applied. In lane 5, 75 µg/ml of each TAK1 complex was used resulting to a total of 150 µg/ml in the assay mix. Other panels, incubation of TAK1(F237E, W241E)-TAB1 (FEWE) with TAK1(T178E, T184E, F237K, W241K)-TAB1, TAK1(W241E, V243E)-TAB1 (WEVE) with TAK1(T178E, T184E, W241K, V243K)-TAB1 and TAK1(I239E, V243E)-TAB1 (IEVE) with TAK1(T178E, T184E, I239K, V243K)-TAB1, respectively.

**Suppl. Fig. S5.  $\alpha$ G-helix-mediated crystal contacts between symmetry-related monomers of the TAK1 kinase domain.** *Upper panel*: Two symmetry-related monomers A (dark grey) and B (light grey) of human TAK1 kinase domain (Protein Data Bank code 2eva). The  $\alpha$ G-helices (residues 235 to 245) are highlighted in green and blue, respectively. *Lower panel*: Magnified front and top view of crystal contact site between both monomers A and B involving hydrophobic TAK1 kinase domain  $\alpha$ G-helix residues Phe-237, Met-240 and Trp-241 (residues shown: 231 to 248).

Suppl. Fig. S1

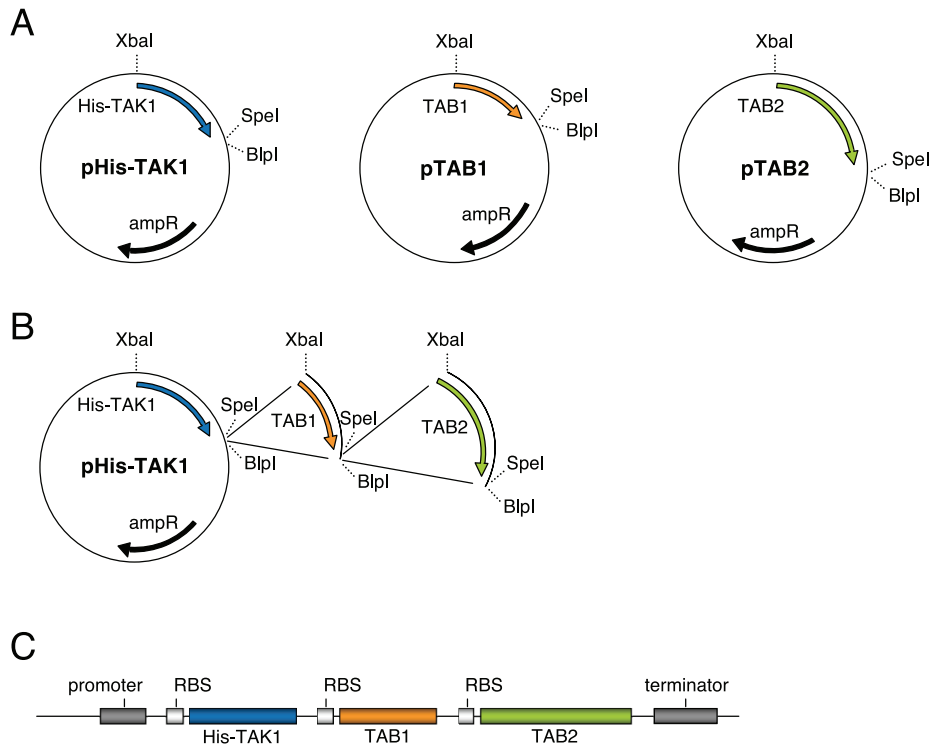

Suppl. Fig. S2

A

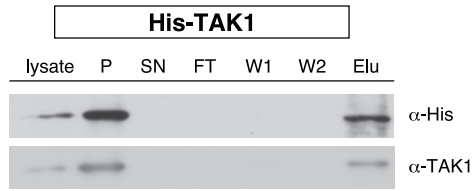

B

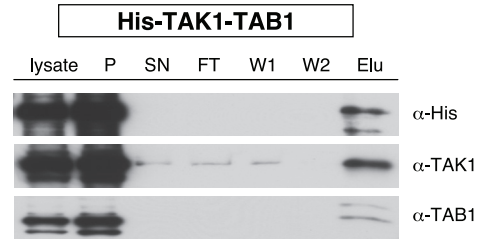

C

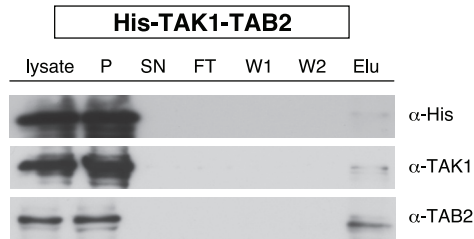

D

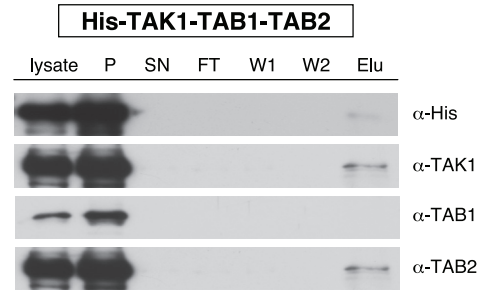

Suppl. Fig. S3

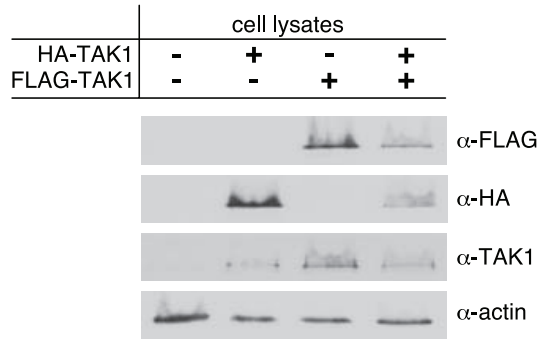

Suppl. Fig. S4

**A**

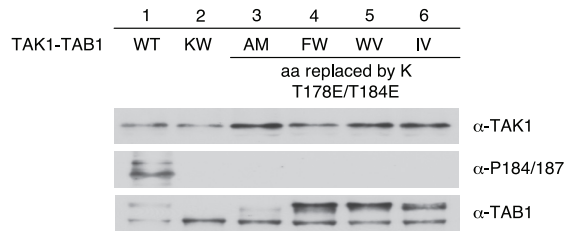

**B**

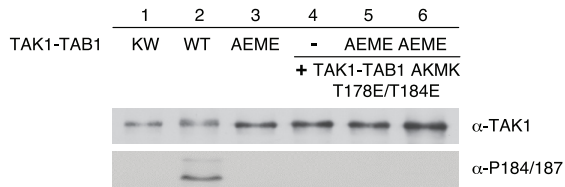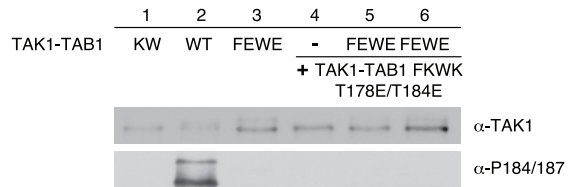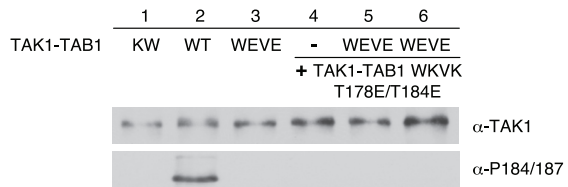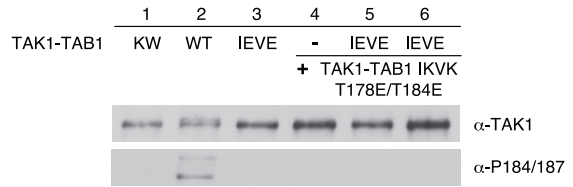

Suppl. Fig. S5

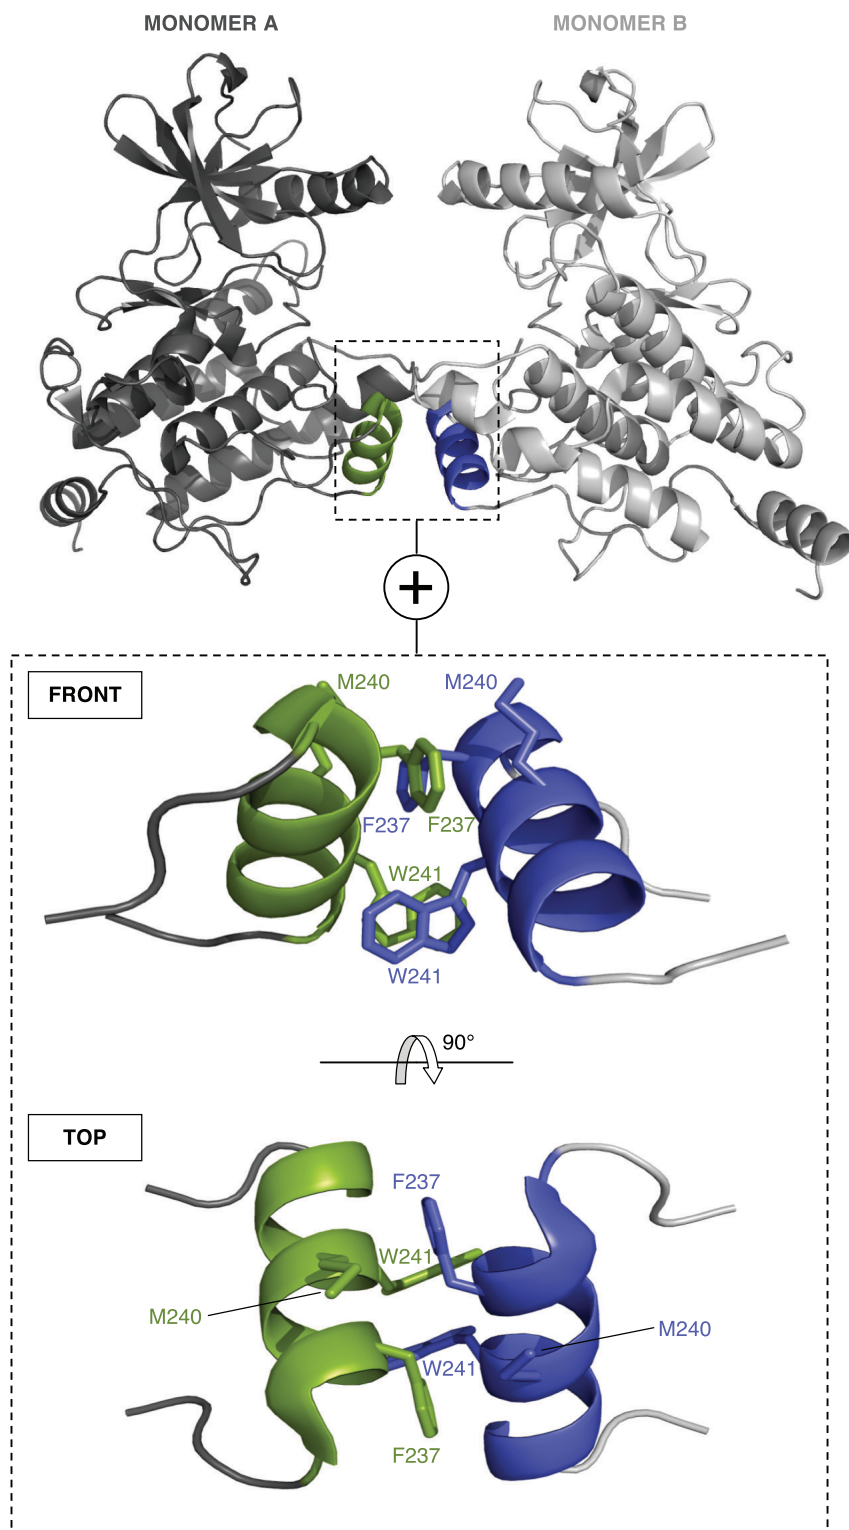

Supplement: supp_M109.093468_jbc.M109.093468-1.pdf [file supp_M109.093468_jbc.M109.093468-1.pdf]
